# Supplementary material for: Metalloradical complex Co–C˙Ph3 catalyzes the CO2 reduction in gas phase: a theoretical study
Source: Royal Society of Chemistry journal article supplement (doi:10.1039/d0cp04453a), 2020-12-08
Supplement: d0cp04453a1.pdf [file d0cp04453a1.pdf]

## Electronic supplementary information (ESI)

### **Metalloradical complex Co-C•Ph<sub>3</sub> catalyzes the CO<sub>2</sub> reduction in gas phase: a theoretical study**

Chuan-Kai Tang,<sup>a</sup> Ya-Zhou Li,<sup>a</sup> Zhong-Jun Zhou,<sup>b</sup> Fang Ma<sup>\*a</sup> and Yirong Mo<sup>\*c</sup>

<sup>a</sup> School of Chemistry and Materials Science, Huaibei Normal University, Huaibei, 235000, China.

<sup>b</sup> Institute of Theoretical Chemistry, Jilin University, Changchun, 130023, China.

<sup>c</sup> Department of Nanoscience, Joint School of Nanoscience and Nanoengineering, University of North Carolina at Greensboro, Greensboro, NC 27401, USA.

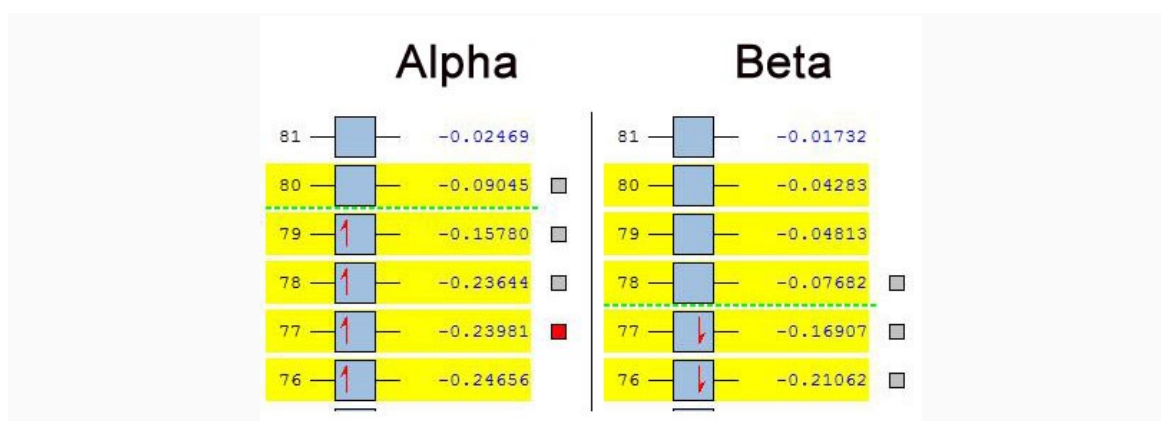

Fig. S1 Partial molecular orbital energy levels of the metalloradical Co-C•Ph<sub>3</sub> ( $\alpha$  orbital and it corresponding  $\beta$  orbital).

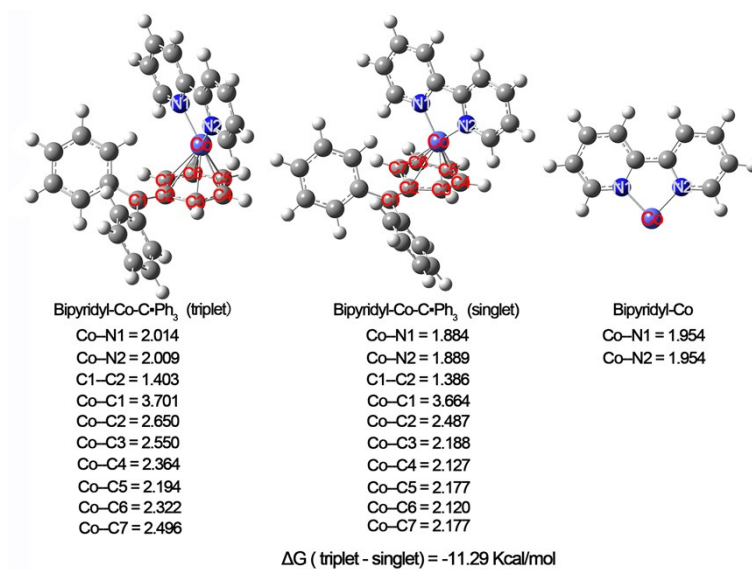

Fig. S2 The optimized geometry of the metalloradical Co-C\*Ph coordinated by a bipyridyl group, including singlet and triplet structures. The bond distances are given in Å.

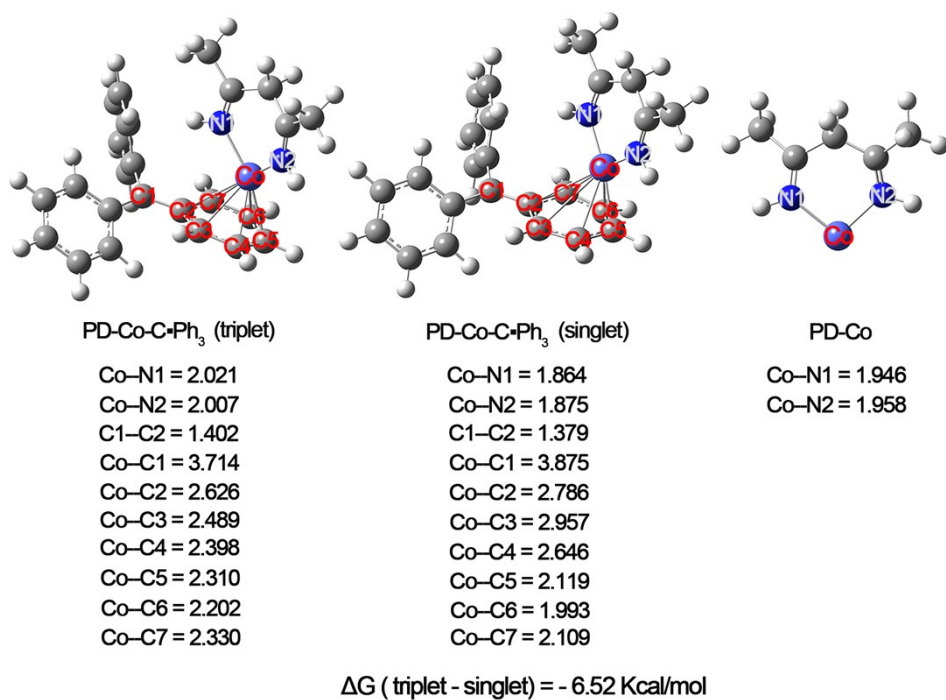

Fig. S3 The optimized geometry of the metalloradical Co-C•Ph coordinated by a pentane-2,4-diimine (PD), including singlet and triplet structures. The bond distances are given in Å.

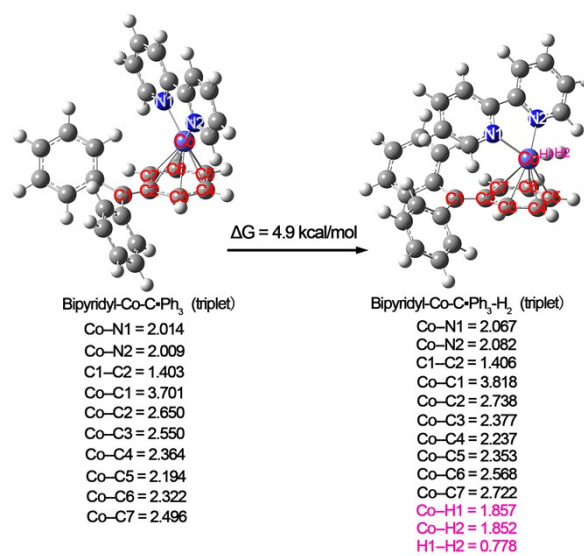

Fig. S4 The formation of Bipryridyl-Co-C•Ph<sub>3</sub>-H<sub>2</sub> with the triplet characters. The bond distances are given in Å.

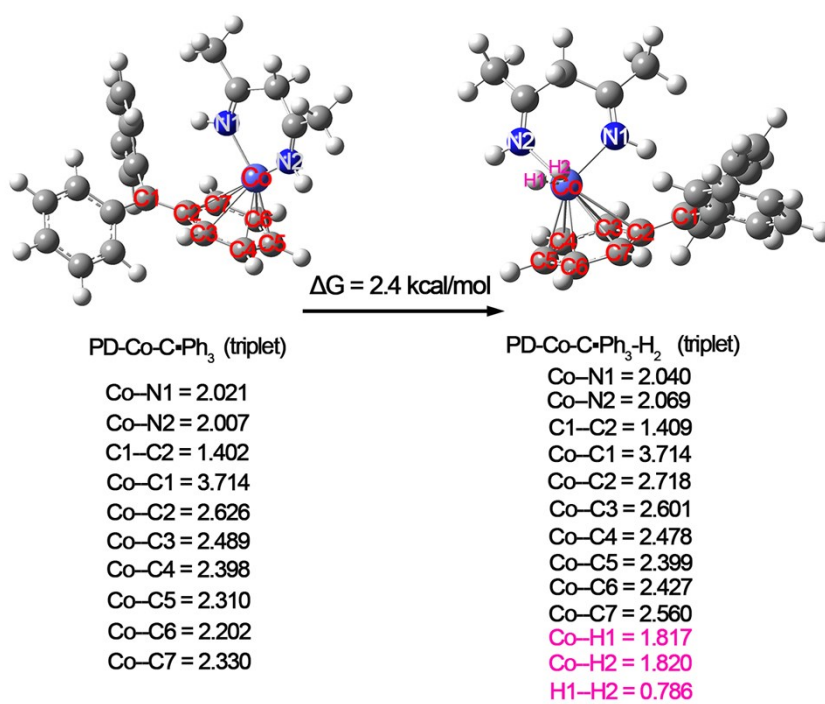

Fig. S5 The formation of PD-Co-C•Ph<sub>3</sub>-H<sub>2</sub> with the triplet characters. The bond distances are given in Å.

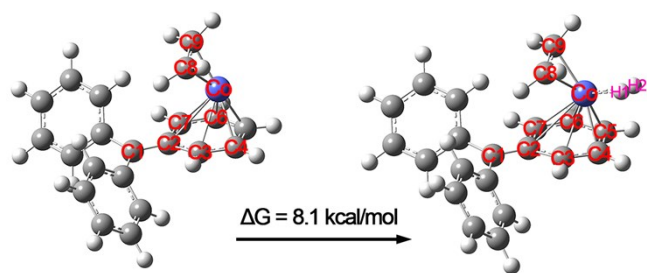

Ethylene-Co-C•Ph<sub>3</sub> (triplet)

C1-C2 = 1.386  
 Co-C1 = 3.868  
 Co-C2 = 2.738  
 Co-C3 = 2.426  
 Co-C4 = 2.206  
 Co-C5 = 2.123  
 Co-C6 = 2.306  
 Co-C7 = 2.557  
 Co-C8 = 2.041  
 Co-C9 = 2.042

Ethylene-Co-C•Ph<sub>3</sub>-H<sub>2</sub> (triplet)

C1-C2 = 1.385  
 Co-C1 = 3.933  
 Co-C2 = 2.828  
 Co-C3 = 2.415  
 Co-C4 = 2.187  
 Co-C5 = 2.141  
 Co-C6 = 2.465  
 Co-C7 = 2.767  
 Co-C8 = 2.096  
 Co-C9 = 2.068  
 Co-H1 = 2.043  
 Co-H2 = 2.023  
 H1-H2 = 0.759

Fig. S6 The formation of Ethylene-Co-C•Ph<sub>3</sub>-H<sub>2</sub> with the triplet characters. The bond distances are given in Å.

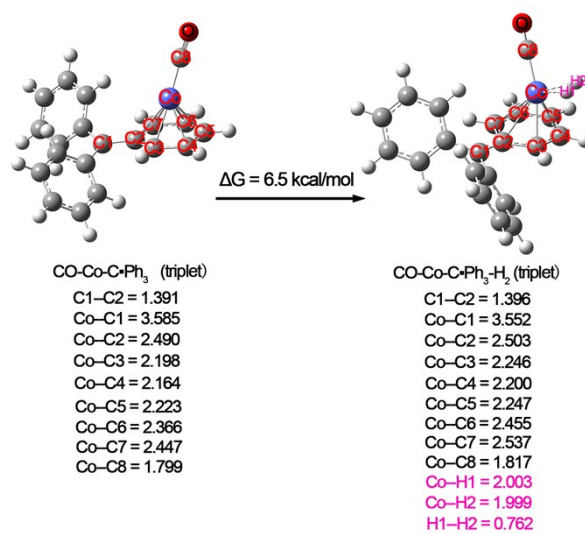

Fig. S7 The formation of CO-Co-C•Ph<sub>3</sub>-H<sub>2</sub> with the triplet characters. The bond distances are given in Å.



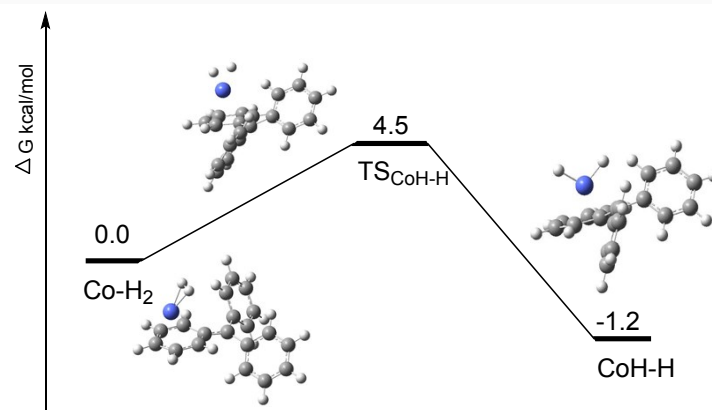

Fig. S8 The profile of splitting H<sub>2</sub> by the metalloradical Co-C•Ph<sub>3</sub>.

## Atomic coordinates of intermediates and key transition states

### Co-CO<sub>2</sub> triplet

|    |           |           |           |
|----|-----------|-----------|-----------|
| 6  | 0.903280  | -0.006231 | -0.429524 |
| 6  | -0.402368 | -0.455754 | -0.857069 |
| 6  | -1.225031 | 0.328792  | -1.725918 |
| 6  | -0.965345 | -1.691079 | -0.381891 |
| 6  | -2.492731 | -0.107057 | -2.131971 |
| 1  | -0.856523 | 1.287570  | -2.065660 |
| 6  | -2.226720 | -2.136903 | -0.815965 |
| 1  | -0.409548 | -2.279902 | 0.333807  |
| 6  | -3.005367 | -1.341513 | -1.681293 |
| 1  | -3.092948 | 0.525119  | -2.775376 |
| 1  | -2.625612 | -3.065043 | -0.425072 |
| 1  | -4.000825 | -1.658110 | -1.966555 |
| 6  | 1.217914  | 1.420992  | -0.355882 |
| 6  | 2.487566  | 1.891263  | -0.749319 |
| 6  | 0.286423  | 2.365389  | 0.120014  |
| 6  | 2.803534  | 3.241974  | -0.684326 |
| 1  | 3.218906  | 1.183903  | -1.122589 |
| 6  | 0.608874  | 3.714487  | 0.192123  |
| 1  | -0.683951 | 2.033084  | 0.468182  |
| 6  | 1.866467  | 4.162033  | -0.213041 |
| 1  | 3.783108  | 3.579915  | -1.006106 |
| 1  | -0.120445 | 4.417110  | 0.581075  |
| 1  | 2.115722  | 5.216188  | -0.156540 |
| 6  | 1.929538  | -0.980825 | -0.074924 |
| 6  | 2.046813  | -2.210971 | -0.755545 |
| 6  | 2.848162  | -0.714247 | 0.961416  |
| 6  | 3.032392  | -3.127474 | -0.414745 |
| 1  | 1.372916  | -2.430069 | -1.576008 |
| 6  | 3.825754  | -1.637816 | 1.306378  |
| 1  | 2.767860  | 0.216358  | 1.510172  |
| 6  | 3.925604  | -2.848958 | 0.620829  |
| 1  | 3.111405  | -4.059890 | -0.964050 |
| 1  | 4.507953  | -1.416682 | 2.120445  |
| 1  | 4.691571  | -3.568206 | 0.889845  |
| 27 | -2.355406 | -0.203509 | 0.182812  |
| 6  | -2.375552 | 0.101720  | 2.067614  |
| 8  | -1.942256 | -0.233545 | 3.129227  |
| 8  | -3.147602 | 0.946852  | 1.525365  |

### Co-H<sub>2</sub> triplet

|   |          |           |           |
|---|----------|-----------|-----------|
| 6 | 0.613403 | -0.020477 | -0.231300 |
|---|----------|-----------|-----------|

|    |           |           |           |
|----|-----------|-----------|-----------|
| 6  | -0.753877 | -0.138907 | -0.435695 |
| 6  | -1.609303 | 0.963601  | -0.847189 |
| 6  | -1.496677 | -1.366039 | -0.160975 |
| 6  | -2.939519 | 0.782475  | -1.209510 |
| 1  | -1.177102 | 1.947677  | -0.966212 |
| 6  | -2.825288 | -1.545919 | -0.533416 |
| 1  | -0.975396 | -2.192270 | 0.303705  |
| 6  | -3.601254 | -0.475824 | -1.070478 |
| 1  | -3.497076 | 1.636297  | -1.581190 |
| 1  | -3.294837 | -2.508462 | -0.355879 |
| 1  | -4.611289 | -0.628163 | -1.426580 |
| 6  | 1.285197  | 1.296170  | -0.177118 |
| 6  | 2.485858  | 1.514534  | -0.875033 |
| 6  | 0.787575  | 2.354156  | 0.602503  |
| 6  | 3.143768  | 2.738061  | -0.815981 |
| 1  | 2.899366  | 0.707591  | -1.470187 |
| 6  | 1.443835  | 3.580101  | 0.663428  |
| 1  | -0.115925 | 2.202272  | 1.183441  |
| 6  | 2.625149  | 3.781559  | -0.048767 |
| 1  | 4.064319  | 2.879953  | -1.373528 |
| 1  | 1.039340  | 4.376246  | 1.281043  |
| 1  | 3.138942  | 4.735943  | -0.000822 |
| 6  | 1.472913  | -1.203644 | -0.031020 |
| 6  | 1.339030  | -2.364041 | -0.815528 |
| 6  | 2.494075  | -1.192261 | 0.937056  |
| 6  | 2.165432  | -3.466535 | -0.624325 |
| 1  | 0.591388  | -2.385206 | -1.600916 |
| 6  | 3.321612  | -2.293203 | 1.128559  |
| 1  | 2.632435  | -0.303975 | 1.543572  |
| 6  | 3.160751  | -3.440906 | 0.352290  |
| 1  | 2.043645  | -4.343437 | -1.252825 |
| 1  | 4.095471  | -2.256542 | 1.889076  |
| 1  | 3.808552  | -4.298802 | 0.498864  |
| 27 | -3.118862 | 0.089260  | 0.882037  |
| 1  | -2.443956 | 0.108846  | 2.396761  |
| 1  | -2.664676 | 0.894608  | 2.271653  |

**TS<sub>a1</sub>**

|   |         |           |          |
|---|---------|-----------|----------|
| 6 | -       | -0.041329 | 0.290710 |
|   | 1.30804 |           |          |
|   | 8       |           |          |
| 6 | 0.02934 | -0.285013 | 0.754532 |
|   | 4       |           |          |
| 6 | 0.72719 | 0.659269  | 1.569083 |

|   |         |           |           |
|---|---------|-----------|-----------|
|   | 6       |           |           |
| 6 | 0.75419 | -1.470219 | 0.391363  |
|   | 8       |           |           |
| 6 | 2.03258 | 0.434978  | 2.003502  |
|   | 6       |           |           |
| 1 | 0.22787 | 1.578087  | 1.846987  |
|   | 9       |           |           |
| 6 | 2.04718 | -1.721397 | 0.863329  |
|   | 7       |           |           |
| 1 | 0.28618 | -2.186374 | -0.270923 |
|   | 5       |           |           |
| 6 | 2.71786 | -0.748594 | 1.641433  |
|   | 3       |           |           |
| 1 | 2.53452 | 1.182902  | 2.605186  |
|   | 7       |           |           |
| 1 | 2.56881 | -2.623221 | 0.568625  |
|   | 4       |           |           |
| 1 | 3.73790 | -0.917300 | 1.956659  |
|   | 5       |           |           |
| 6 | -       | 1.327795  | 0.159182  |
|   | 1.81502 |           |           |
|   | 6       |           |           |
| 6 | -       | 1.639730  | 0.527949  |
|   | 3.13836 |           |           |
|   | 8       |           |           |
| 6 | -       | 2.364849  | -0.352577 |
|   | 1.01079 |           |           |
|   | 9       |           |           |
| 6 | -       | 2.934187  | 0.408728  |
|   | 3.62791 |           |           |
|   | 8       |           |           |
| 1 | -       | 0.857012  | 0.925916  |
|   | 3.77391 |           |           |
|   | 2       |           |           |
| 6 | -       | 3.656606  | -0.479386 |
|   | 1.50685 |           |           |
|   | 4       |           |           |
| 1 | -       | 2.144862  | -0.680086 |
|   | 0.00134 |           |           |
|   | 8       |           |           |
| 6 | -       | 3.950284  | -0.095188 |
|   | 2.81523 |           |           |
|   | 9       |           |           |
| 1 | -       | 3.153287  | 0.713878  |

|    |         |           |           |
|----|---------|-----------|-----------|
|    | 4.64580 |           |           |
|    | 5       |           |           |
| 1  | -       | 4.434811  | -0.891011 |
|    | 0.87278 |           |           |
|    | 9       |           |           |
| 1  | -       | 4.959804  | -0.192620 |
|    | 3.19980 |           |           |
|    | 9       |           |           |
| 6  | -       | -1.153818 | -0.059305 |
|    | 2.18976 |           |           |
|    | 4       |           |           |
| 6  | -       | -2.363108 | 0.666005  |
|    | 2.17893 |           |           |
|    | 8       |           |           |
| 6  | -       | -1.040104 | -1.130408 |
|    | 3.09956 |           |           |
|    | 7       |           |           |
| 6  | -       | -3.408693 | 0.330173  |
|    | 3.02893 |           |           |
|    | 6       |           |           |
| 1  | -       | -2.465502 | 1.518498  |
|    | 1.51698 |           |           |
|    | 6       |           |           |
| 6  | -       | -2.090878 | -1.469418 |
|    | 3.94183 |           |           |
|    | 4       |           |           |
| 1  | -       | -0.122116 | -1.705578 |
|    | 3.12464 |           |           |
|    | 7       |           |           |
| 6  | -       | -3.281334 | -0.742341 |
|    | 3.91240 |           |           |
|    | 0       |           |           |
| 1  | -       | -4.323101 | 0.913970  |
|    | 3.01150 |           |           |
|    | 2       |           |           |
| 1  | -       | -1.983801 | -2.308486 |
|    | 4.62125 |           |           |
|    | 7       |           |           |
| 1  | -       | -4.099617 | -1.005810 |
|    | 4.57368 |           |           |
|    | 3       |           |           |
| 27 | 2.32940 | 0.088404  | -0.314808 |
|    | 2       |           |           |
| 1  | 2.20371 | 1.420310  | -1.362762 |

|   |         |           |           |
|---|---------|-----------|-----------|
|   | 0       |           |           |
| 1 | 3.19394 | 1.335852  | -1.566436 |
|   | 3       |           |           |
| 6 | 4.28334 | -0.081993 | -0.870075 |
|   | 2       |           |           |
| 8 | 5.01828 | -0.966300 | -0.521002 |
|   | 3       |           |           |
| 8 | 4.42675 | 0.928388  | -1.650237 |
|   | 6       |           |           |

**HCo-COOH**

|   |         |           |          |
|---|---------|-----------|----------|
| 6 | 1.16882 | 0.027964  | 0.354873 |
|   | 8       |           |          |
| 6 | -       | -0.201737 | 0.790005 |
|   | 0.11946 |           |          |
|   | 7       |           |          |
| 6 | -       | -1.495026 | 1.251948 |
|   | 0.59858 |           |          |
|   | 0       |           |          |
| 6 | -       | 0.772247  | 0.647561 |
|   | 1.20258 |           |          |
|   | 5       |           |          |
| 6 | -       | -1.635740 | 1.852719 |
|   | 1.83330 |           |          |
|   | 7       |           |          |
| 1 | 0.05493 | -2.354818 | 1.191114 |
|   | 0       |           |          |
| 6 | -       | 0.705654  | 1.442286 |
|   | 2.38353 |           |          |
|   | 2       |           |          |
| 1 | -       | 1.677183  | 0.085880 |
|   | 1.01850 |           |          |
|   | 3       |           |          |
| 6 | -       | -0.527175 | 1.984193 |
|   | 2.73972 |           |          |
|   | 9       |           |          |
| 1 | -       | -2.612733 | 2.208047 |
|   | 2.14081 |           |          |
|   | 9       |           |          |
| 1 | -       | 1.539085  | 1.453855 |
|   | 3.07341 |           |          |
|   | 0       |           |          |

|   |         |           |           |
|---|---------|-----------|-----------|
| 1 | -       | -0.662172 | 2.481705  |
|   | 3.69221 |           |           |
|   | 6       |           |           |
| 6 | 2.09411 | -1.082832 | 0.043753  |
|   | 6       |           |           |
| 6 | 3.41334 | -1.070786 | 0.521974  |
|   | 7       |           |           |
| 6 | 1.68953 | -2.144464 | -0.780016 |
|   | 0       |           |           |
| 6 | 4.29005 | -2.104937 | 0.213955  |
|   | 3       |           |           |
| 1 | 3.74337 | -0.245536 | 1.143330  |
|   | 3       |           |           |
| 6 | 2.57213 | -3.172534 | -1.098414 |
|   | 3       |           |           |
| 1 | 0.68544 | -2.142014 | -1.190085 |
|   | 0       |           |           |
| 6 | 3.87264 | -3.160593 | -0.597066 |
|   | 5       |           |           |
| 1 | 5.30230 | -2.087045 | 0.604132  |
|   | 2       |           |           |
| 1 | 2.24667 | -3.978474 | -1.747953 |
|   | 5       |           |           |
| 1 | 4.55964 | -3.963248 | -0.843288 |
|   | 3       |           |           |
| 6 | 1.66597 | 1.395703  | 0.131136  |
|   | 0       |           |           |
| 6 | 1.34466 | 2.446698  | 1.008134  |
|   | 1       |           |           |
| 6 | 2.50024 | 1.679443  | -0.964440 |
|   | 1       |           |           |
| 6 | 1.81885 | 3.734380  | 0.785352  |
|   | 7       |           |           |
| 1 | 0.74190 | 2.239548  | 1.884998  |
|   | 6       |           |           |
| 6 | 2.96585 | 2.968752  | -1.191117 |
|   | 3       |           |           |
| 1 | 2.76592 | 0.881606  | -1.648112 |
|   | 9       |           |           |
| 6 | 2.62709 | 4.002668  | -0.318300 |
|   | 8       |           |           |
| 1 | 1.56556 | 4.528189  | 1.480166  |
|   | 8       |           |           |
| 1 | 3.59323 | 3.169258  | -2.053209 |

|                        |         |           |           |  |
|------------------------|---------|-----------|-----------|--|
|                        | 6       |           |           |  |
| 1                      | 2.99598 | 5.007624  | -0.493089 |  |
|                        | 7       |           |           |  |
| 27                     | -       | -0.655666 | -0.136404 |  |
|                        | 2.40676 |           |           |  |
|                        | 2       |           |           |  |
| 1                      | -       | -1.062112 | -1.449125 |  |
|                        | 1.78636 |           |           |  |
|                        | 9       |           |           |  |
| 1                      | -       | -1.241801 | -2.147682 |  |
|                        | 3.88979 |           |           |  |
|                        | 1       |           |           |  |
| 6                      | -       | 0.395346  | -1.215831 |  |
|                        | 3.50886 |           |           |  |
|                        | 5       |           |           |  |
| 8                      | -       | 1.584106  | -1.185300 |  |
|                        | 3.67365 |           |           |  |
|                        | 8       |           |           |  |
| 8                      | -       | -0.371306 | -2.049919 |  |
|                        | 4.30228 |           |           |  |
|                        | 2       |           |           |  |
| <b>TS<sub>a2</sub></b> |         |           |           |  |
| 6                      | 1.19222 | -0.001332 | -0.319582 |  |
|                        | 7       |           |           |  |
| 6                      | -       | -0.297298 | -0.786741 |  |
|                        | 0.10469 |           |           |  |
|                        | 1       |           |           |  |
| 6                      | -       | 0.681647  | -1.449963 |  |
|                        | 0.94456 |           |           |  |
|                        | 9       |           |           |  |
| 6                      | -       | -1.582545 | -0.567624 |  |
|                        | 0.74507 |           |           |  |
|                        | 0       |           |           |  |
| 6                      | -       | 0.371975  | -1.937322 |  |
|                        | 2.21183 |           |           |  |
|                        | 9       |           |           |  |
| 1                      | -       | 1.678523  | -1.604769 |  |
|                        | 0.55525 |           |           |  |
|                        | 4       |           |           |  |
| 6                      | -       | -1.883377 | -1.050147 |  |
|                        | 2.02057 |           |           |  |
|                        | 2       |           |           |  |
| 1                      | -       | -2.330522 | 0.008201  |  |



|   |         |           |           |
|---|---------|-----------|-----------|
|   | 0.21734 |           |           |
|   | 0       |           |           |
| 6 | -       | -0.897917 | -1.703740 |
|   | 2.80289 |           |           |
|   | 5       |           |           |
| 1 | -       | 1.144021  | -2.445137 |
|   | 2.78026 |           |           |
|   | 5       |           |           |
| 1 | -       | -2.853376 | -0.832440 |
|   | 2.45240 |           |           |
|   | 4       |           |           |
| 1 | -       | -1.123678 | -2.053970 |
|   | 3.80128 |           |           |
|   | 0       |           |           |
| 6 | 1.65769 | 1.390421  | -0.174148 |
|   | 7       |           |           |
| 6 | 2.93642 | 1.762028  | -0.626639 |
|   | 4       |           |           |
| 6 | 0.87057 | 2.378150  | 0.443788  |
|   | 5       |           |           |
| 6 | 3.39678 | 3.066540  | -0.489936 |
|   | 6       |           |           |
| 1 | 3.56538 | 1.014075  | -1.096360 |
|   | 5       |           |           |
| 6 | 1.33174 | 3.682908  | 0.583337  |
|   | 7       |           |           |
| 1 | -       | 2.107051  | 0.840822  |
|   | 0.10181 |           |           |
|   | 4       |           |           |
| 6 | 2.59615 | 4.036242  | 0.113601  |
|   | 0       |           |           |
| 1 | 4.38359 | 3.328721  | -0.857591 |
|   | 4       |           |           |
| 1 | 0.70867 | 4.422511  | 1.076020  |
|   | 3       |           |           |
| 1 | 2.95720 | 5.053076  | 0.225176  |
|   | 8       |           |           |
| 6 | 2.13970 | -1.067688 | 0.035146  |
|   | 7       |           |           |
| 6 | 2.26174 | -2.239716 | -0.735522 |
|   | 1       |           |           |
| 6 | 2.99049 | -0.926749 | 1.147871  |
|   | 8       |           |           |
| 6 | 3.17697 | -3.230377 | -0.398979 |

|         |         |           |           |
|---------|---------|-----------|-----------|
|         | 3       |           |           |
| 1       | 1.64922 | -2.356564 | -1.622685 |
|         | 5       |           |           |
| 6       | 3.90175 | -1.919732 | 1.486536  |
|         | 2       |           |           |
| 1       | 2.92132 | -0.029613 | 1.752465  |
|         | 8       |           |           |
| 6       | 3.99988 | -3.079019 | 0.716874  |
|         | 5       |           |           |
| 1       | 3.25848 | -4.118363 | -1.017648 |
|         | 2       |           |           |
| 1       | 4.53622 | -1.790936 | 2.357447  |
|         | 5       |           |           |
| 1       | 4.71368 | -3.852373 | 0.979704  |
|         | 5       |           |           |
| 27      | -       | -0.147673 | 0.250312  |
|         | 2.21833 |           |           |
|         | 1       |           |           |
| 1       | -       | 1.021486  | 1.179177  |
|         | 2.89503 |           |           |
|         | 5       |           |           |
| 1       | -       | 1.162972  | -0.023026 |
|         | 4.78713 |           |           |
|         | 4       |           |           |
| 6       | -       | 0.127402  | 1.260928  |
|         | 3.82092 |           |           |
|         | 7       |           |           |
| 8       | -       | -0.624805 | 2.211025  |
|         | 3.81327 |           |           |
|         | 0       |           |           |
| 8       | -       | 0.614774  | 0.748013  |
|         | 4.98683 |           |           |
|         | 3       |           |           |
| TSCoH-H |         |           |           |
| 6       | 0.58109 | -0.023602 | -0.240051 |
|         | 8       |           |           |
| 6       | -       | -0.293387 | -0.468207 |
|         | 0.79225 |           |           |
|         | 0       |           |           |
| 6       | -       | 0.679536  | -1.049785 |
|         | 1.68638 |           |           |
|         | 4       |           |           |
| 6       | -       | -1.534792 | -0.056521 |

|   |         |           |           |
|---|---------|-----------|-----------|
|   | 1.41329 |           |           |
|   | 3       |           |           |
| 6 | -       | 0.394790  | -1.304712 |
|   | 3.02867 |           |           |
|   | 9       |           |           |
| 1 | -       | 1.645022  | -1.334053 |
|   | 1.29082 |           |           |
|   | 7       |           |           |
| 6 | -       | -1.820352 | -0.319986 |
|   | 2.75369 |           |           |
|   | 1       |           |           |
| 1 | -       | -2.264352 | 0.469866  |
|   | 0.81365 |           |           |
|   | 8       |           |           |
| 6 | -       | -0.848077 | -0.919171 |
|   | 3.59175 |           |           |
|   | 6       |           |           |
| 1 | -       | 1.148659  | -1.770531 |
|   | 3.65233 |           |           |
|   | 2       |           |           |
| 1 | -       | -2.768235 | 0.000634  |
|   | 3.16974 |           |           |
|   | 0       |           |           |
| 1 | -       | -1.055197 | -1.093885 |
|   | 4.63988 |           |           |
|   | 4       |           |           |
| 6 | 1.09484 | 1.354078  | -0.190674 |
|   | 7       |           |           |
| 6 | 2.31813 | 1.683506  | -0.804116 |
|   | 2       |           |           |
| 6 | 0.41053 | 2.373903  | 0.496773  |
|   | 3       |           |           |
| 6 | 2.82397 | 2.976785  | -0.749279 |
|   | 5       |           |           |
| 1 | 2.86631 | 0.912167  | -1.333216 |
|   | 6       |           |           |
| 6 | 0.92016 | 3.666180  | 0.554529  |
|   | 8       |           |           |
| 1 | -       | 2.138462  | 1.009851  |
|   | 0.51474 |           |           |
|   | 7       |           |           |
| 6 | 2.12737 | 3.977155  | -0.070998 |
|   | 0       |           |           |
| 1 | 3.76402 | 3.206861  | -1.240429 |

|                        |         |           |           |
|------------------------|---------|-----------|-----------|
|                        | 0       |           |           |
| 1                      | 0.37915 | 4.430790  | 1.102809  |
|                        | 3       |           |           |
| 1                      | 2.52436 | 4.985722  | -0.024721 |
|                        | 7       |           |           |
| 6                      | 1.54145 | -1.116234 | -0.042832 |
|                        | 0       |           |           |
| 6                      | 1.47957 | -2.302764 | -0.799344 |
|                        | 9       |           |           |
| 6                      | 2.58367 | -0.995377 | 0.896666  |
|                        | 4       |           |           |
| 6                      | 2.40625 | -3.322250 | -0.616690 |
|                        | 5       |           |           |
| 1                      | 0.70962 | -2.407550 | -1.555713 |
|                        | 6       |           |           |
| 6                      | 3.50586 | -2.017948 | 1.082861  |
|                        | 5       |           |           |
| 1                      | 2.65528 | -0.090915 | 1.489640  |
|                        | 7       |           |           |
| 6                      | 3.42336 | -3.188680 | 0.328760  |
|                        | 2       |           |           |
| 1                      | 2.34305 | -4.219848 | -1.223588 |
|                        | 3       |           |           |
| 1                      | 4.29147 | -1.903147 | 1.822764  |
|                        | 2       |           |           |
| 1                      | 4.14635 | -3.984718 | 0.471534  |
|                        | 6       |           |           |
| 27                     | -       | 0.043151  | 0.907603  |
|                        | 2.81098 |           |           |
|                        | 5       |           |           |
| 1                      | -       | 0.046089  | 2.406457  |
|                        | 2.60300 |           |           |
|                        | 0       |           |           |
| 1                      | -       | 1.160297  | 1.933976  |
|                        | 2.80039 |           |           |
|                        | 2       |           |           |
| <b>TS<sub>b1</sub></b> |         |           |           |
| 6                      | -       | -0.000602 | 0.294631  |
|                        | 1.37350 |           |           |
|                        | 0       |           |           |
| 6                      | -       | -0.023524 | 0.686078  |
|                        | 0.05527 |           |           |
|                        | 6       |           |           |

|   |                   |           |           |
|---|-------------------|-----------|-----------|
| 6 | 0.63871<br>5      | 1.125773  | 1.236370  |
| 6 | 0.81973<br>1      | -1.190288 | 0.496627  |
| 6 | 1.89354<br>5      | 1.023332  | 1.785268  |
| 1 | 0.12961<br>3      | 2.079518  | 1.272384  |
| 6 | 2.00042<br>0      | -1.354282 | 1.246995  |
| 1 | 0.42587<br>8      | -2.040361 | -0.042409 |
| 6 | 2.60422<br>3      | -0.224121 | 1.821160  |
| 1 | 2.36974<br>3      | 1.906486  | 2.195335  |
| 1 | 2.52262<br>5      | -2.304564 | 1.237924  |
| 1 | 3.55422<br>0      | -0.297995 | 2.333658  |
| 6 | -<br>2.10938<br>6 | 1.269144  | 0.105330  |
| 6 | -<br>3.40697<br>7 | 1.427909  | 0.616183  |
| 6 | -<br>1.55476<br>0 | 2.321541  | -0.639668 |
| 6 | -<br>4.11203<br>5 | 2.609550  | 0.416941  |
| 1 | -<br>3.85721<br>6 | 0.615198  | 1.175699  |
| 6 | -<br>2.26388<br>2 | 3.501379  | -0.846594 |
| 1 | -<br>0.57021<br>1 | 2.198927  | -1.078143 |
| 6 | -<br>3.54276<br>3 | 3.652908  | -0.313762 |

|    |         |           |           |
|----|---------|-----------|-----------|
| 1  | -       | 2.717729  | 0.831027  |
|    | 5.10921 |           |           |
|    | 6       |           |           |
| 1  | -       | 4.298645  | -1.434529 |
|    | 1.82093 |           |           |
|    | 0       |           |           |
| 1  | -       | 4.572620  | -0.473352 |
|    | 4.09553 |           |           |
|    | 1       |           |           |
| 6  | -       | -1.241368 | -0.028326 |
|    | 2.10686 |           |           |
|    | 7       |           |           |
| 6  | -       | -2.377751 | 0.794279  |
|    | 2.02792 |           |           |
|    | 6       |           |           |
| 6  | -       | -1.303316 | -1.160565 |
|    | 2.93619 |           |           |
|    | 8       |           |           |
| 6  | -       | -3.537369 | 0.484706  |
|    | 2.73063 |           |           |
|    | 6       |           |           |
| 1  | -       | -2.335514 | 1.696950  |
|    | 1.42806 |           |           |
|    | 7       |           |           |
| 6  | -       | -2.464699 | -1.473621 |
|    | 3.63407 |           |           |
|    | 1       |           |           |
| 1  | -       | -0.432070 | -1.799889 |
|    | 3.02300 |           |           |
|    | 9       |           |           |
| 6  | -       | -3.588334 | -0.654217 |
|    | 3.53360 |           |           |
|    | 7       |           |           |
| 1  | -       | -4.398896 | 1.141073  |
|    | 2.66259 |           |           |
|    | 6       |           |           |
| 1  | -       | -2.493309 | -2.360491 |
|    | 4.25864 |           |           |
|    | 1       |           |           |
| 1  | -       | -4.491979 | -0.895377 |
|    | 4.08318 |           |           |
|    | 8       |           |           |
| 27 | 2.50054 | -0.051911 | -0.375132 |
|    | 7       |           |           |

|   |         |           |           |
|---|---------|-----------|-----------|
| 6 | 4.91315 | 0.271279  | -0.889440 |
|   | 0       |           |           |
| 8 | 5.70319 | 1.110155  | -1.113652 |
|   | 1       |           |           |
| 8 | 4.59079 | -0.863882 | -0.638597 |
|   | 3       |           |           |
| 1 | 3.43452 | 1.082107  | -0.986046 |
|   | 8       |           |           |
| 1 | 1.80685 | 0.298462  | -1.690353 |
|   | 9       |           |           |

### HCo-OCHO

|   |           |           |           |
|---|-----------|-----------|-----------|
| 6 | -1.061072 | -0.011784 | 0.311792  |
| 6 | 0.153987  | -0.597946 | 0.556853  |
| 6 | 1.371795  | 0.083635  | 0.983209  |
| 6 | 0.501611  | -1.956559 | 0.134820  |
| 6 | 2.375832  | -0.619352 | 1.730869  |
| 1 | 1.406804  | 1.162264  | 1.000734  |
| 6 | 1.595014  | -2.635043 | 0.655492  |
| 1 | -0.140018 | -2.465814 | -0.571583 |
| 6 | 2.500448  | -1.988614 | 1.567942  |
| 1 | 3.134284  | -0.058008 | 2.263634  |
| 1 | 1.796616  | -3.649399 | 0.330632  |
| 1 | 3.323658  | -2.537216 | 2.008482  |
| 6 | -1.267888 | 1.451473  | 0.391911  |
| 6 | -2.379553 | 1.967592  | 1.076345  |
| 6 | -0.399727 | 2.343008  | -0.256677 |
| 6 | -2.600195 | 3.338603  | 1.139534  |
| 1 | -3.066850 | 1.284848  | 1.564539  |
| 6 | -0.630029 | 3.715126  | -0.199007 |
| 1 | 0.452053  | 1.974967  | -0.816762 |
| 6 | -1.724539 | 4.218104  | 0.501404  |
| 1 | -3.456919 | 3.722128  | 1.684049  |
| 1 | 0.051987  | 4.386206  | -0.709865 |
| 1 | -1.899606 | 5.288061  | 0.545859  |
| 6 | -2.224170 | -0.824279 | -0.097830 |
| 6 | -2.525532 | -2.045310 | 0.527696  |
| 6 | -3.075958 | -0.373920 | -1.120531 |
| 6 | -3.623968 | -2.800979 | 0.129499  |
| 1 | -1.909517 | -2.384033 | 1.353450  |
| 6 | -4.167352 | -1.133780 | -1.524168 |
| 1 | -2.866069 | 0.573661  | -1.602937 |
| 6 | -4.446093 | -2.350957 | -0.901954 |
| 1 | -3.846475 | -3.735235 | 0.634536  |

|    |           |           |           |
|----|-----------|-----------|-----------|
| 1  | -4.804235 | -0.775412 | -2.326057 |
| 1  | -5.303652 | -2.938478 | -1.212166 |
| 27 | 2.434186  | -0.966198 | -0.391378 |
| 6  | 3.720281  | 1.396180  | -1.223455 |
| 8  | 2.725765  | 2.098501  | -1.260331 |
| 8  | 3.816928  | 0.162712  | -0.820322 |
| 1  | 4.705793  | 1.787374  | -1.537606 |
| 1  | 1.800232  | -0.689470 | -1.698964 |

**TS<sub>b2</sub>**

|   |           |           |           |
|---|-----------|-----------|-----------|
| 6 | 1.115893  | 0.027938  | -0.359724 |
| 6 | -0.063126 | -0.633061 | -0.731374 |
| 6 | -1.150037 | 0.022777  | -1.436801 |
| 6 | -0.348479 | -2.009251 | -0.350846 |
| 6 | -2.316762 | -0.632441 | -1.787830 |
| 1 | -1.040979 | 1.063819  | -1.708563 |
| 6 | -1.510947 | -2.679765 | -0.743035 |
| 1 | 0.381064  | -2.543106 | 0.243175  |
| 6 | -2.556911 | -1.989523 | -1.410575 |
| 1 | -3.099057 | -0.076168 | -2.290300 |
| 1 | -1.652030 | -3.713157 | -0.445547 |
| 1 | -3.463560 | -2.497480 | -1.708254 |
| 6 | 1.208618  | 1.500907  | -0.361507 |
| 6 | 2.353940  | 2.144366  | -0.863435 |
| 6 | 0.189104  | 2.309888  | 0.171035  |
| 6 | 2.463838  | 3.530242  | -0.854432 |
| 1 | 3.159494  | 1.542164  | -1.268818 |
| 6 | 0.297258  | 3.696283  | 0.180418  |
| 1 | -0.690100 | 1.840859  | 0.598818  |
| 6 | 1.434848  | 4.315944  | -0.335167 |
| 1 | 3.354878  | 4.000359  | -1.258170 |
| 1 | -0.504362 | 4.294233  | 0.602166  |
| 1 | 1.521121  | 5.397297  | -0.326964 |
| 6 | 2.309997  | -0.717666 | 0.072138  |
| 6 | 2.731111  | -1.886692 | -0.588908 |
| 6 | 3.095716  | -0.258515 | 1.145778  |
| 6 | 3.869636  | -2.574522 | -0.183901 |
| 1 | 2.169868  | -2.238839 | -1.447455 |
| 6 | 4.232697  | -0.947334 | 1.552295  |
| 1 | 2.800533  | 0.647117  | 1.663714  |
| 6 | 4.626217  | -2.111705 | 0.892434  |
| 1 | 4.177128  | -3.466594 | -0.720462 |
| 1 | 4.813984  | -0.575397 | 2.390038  |
| 1 | 5.516039  | -2.646392 | 1.207384  |



|    |           |           |          |
|----|-----------|-----------|----------|
| 27 | -2.205779 | -1.059797 | 0.463936 |
| 6  | -3.799521 | 1.221573  | 1.393586 |
| 8  | -4.143126 | 1.551088  | 0.292468 |
| 8  | -3.282176 | 0.027394  | 1.739814 |
| 1  | -3.874706 | 1.863137  | 2.284396 |
| 1  | -3.709401 | -0.881828 | 0.999435 |

**TS<sub>CH3-H</sub>**

|    |           |           |           |
|----|-----------|-----------|-----------|
| 6  | 0.719602  | -0.030439 | -0.352370 |
| 6  | -0.614928 | -0.262590 | -0.690597 |
| 6  | -1.504592 | 0.772151  | -1.198392 |
| 6  | -1.279468 | -1.540548 | -0.459160 |
| 6  | -2.820276 | 0.510290  | -1.587279 |
| 1  | -1.108554 | 1.765367  | -1.359481 |
| 6  | -2.598843 | -1.774261 | -0.802791 |
| 1  | -0.720928 | -2.330263 | 0.025359  |
| 6  | -3.422811 | -0.744915 | -1.344982 |
| 1  | -3.411859 | 1.317740  | -2.005065 |
| 1  | -3.039538 | -2.737750 | -0.570856 |
| 1  | -4.452005 | -0.935110 | -1.615208 |
| 6  | 1.275277  | 1.335764  | -0.255086 |
| 6  | 2.520352  | 1.638728  | -0.834045 |
| 6  | 0.620704  | 2.361154  | 0.448708  |
| 6  | 3.071935  | 2.911117  | -0.734945 |
| 1  | 3.053062  | 0.860088  | -1.368781 |
| 6  | 1.171026  | 3.635046  | 0.550266  |
| 1  | -0.321727 | 2.147519  | 0.941439  |
| 6  | 2.399239  | 3.919489  | -0.044771 |
| 1  | 4.030440  | 3.118303  | -1.200199 |
| 1  | 0.646503  | 4.403817  | 1.109105  |
| 1  | 2.830631  | 4.911693  | 0.035150  |
| 6  | 1.648692  | -1.139167 | -0.066294 |
| 6  | 1.688031  | -2.301722 | -0.857595 |
| 6  | 2.564781  | -1.046903 | 0.997856  |
| 6  | 2.582878  | -3.331166 | -0.584966 |
| 1  | 1.024839  | -2.381640 | -1.712059 |
| 6  | 3.458355  | -2.075849 | 1.271970  |
| 1  | 2.565987  | -0.154665 | 1.614214  |
| 6  | 3.471727  | -3.227224 | 0.484447  |
| 1  | 2.597160  | -4.211667 | -1.219755 |
| 1  | 4.146541  | -1.980593 | 2.105978  |
| 1  | 4.171489  | -4.028789 | 0.696071  |
| 27 | -2.734753 | 0.094472  | 0.572605  |
| 1  | -3.942391 | -0.048294 | 1.448664  |

|   |           |           |          |
|---|-----------|-----------|----------|
| 6 | -2.707098 | 0.009306  | 2.548112 |
| 1 | -3.226235 | 0.753940  | 3.150693 |
| 1 | -1.629030 | 0.246037  | 2.545958 |
| 1 | -2.843568 | -0.976042 | 2.989911 |

**TS1<sub>CoH-O</sub>**

|    |           |           |           |
|----|-----------|-----------|-----------|
| 6  | 0.719602  | -0.030439 | -0.352370 |
| 6  | -0.614928 | -0.262590 | -0.690597 |
| 6  | -1.504592 | 0.772151  | -1.198392 |
| 6  | -1.279468 | -1.540548 | -0.459160 |
| 6  | -2.820276 | 0.510290  | -1.587279 |
| 1  | -1.108554 | 1.765367  | -1.359481 |
| 6  | -2.598843 | -1.774261 | -0.802791 |
| 1  | -0.720928 | -2.330263 | 0.025359  |
| 6  | -3.422811 | -0.744915 | -1.344982 |
| 1  | -3.411859 | 1.317740  | -2.005065 |
| 1  | -3.039538 | -2.737750 | -0.570856 |
| 1  | -4.452005 | -0.935110 | -1.615208 |
| 6  | 1.275277  | 1.335764  | -0.255086 |
| 6  | 2.520352  | 1.638728  | -0.834045 |
| 6  | 0.620704  | 2.361154  | 0.448708  |
| 6  | 3.071935  | 2.911117  | -0.734945 |
| 1  | 3.053062  | 0.860088  | -1.368781 |
| 6  | 1.171026  | 3.635046  | 0.550266  |
| 1  | -0.321727 | 2.147519  | 0.941439  |
| 6  | 2.399239  | 3.919489  | -0.044771 |
| 1  | 4.030440  | 3.118303  | -1.200199 |
| 1  | 0.646503  | 4.403817  | 1.109105  |
| 1  | 2.830631  | 4.911693  | 0.035150  |
| 6  | 1.648692  | -1.139167 | -0.066294 |
| 6  | 1.688031  | -2.301722 | -0.857595 |
| 6  | 2.564781  | -1.046903 | 0.997856  |
| 6  | 2.582878  | -3.331166 | -0.584966 |
| 1  | 1.024839  | -2.381640 | -1.712059 |
| 6  | 3.458355  | -2.075849 | 1.271970  |
| 1  | 2.565987  | -0.154665 | 1.614214  |
| 6  | 3.471727  | -3.227224 | 0.484447  |
| 1  | 2.597160  | -4.211667 | -1.219755 |
| 1  | 4.146541  | -1.980593 | 2.105978  |
| 1  | 4.171489  | -4.028789 | 0.696071  |
| 27 | -2.734753 | 0.094472  | 0.572605  |
| 1  | -3.942391 | -0.048294 | 1.448664  |
| 6  | -2.707098 | 0.009306  | 2.548112  |
| 1  | -3.226235 | 0.753940  | 3.150693  |

|   |           |           |          |
|---|-----------|-----------|----------|
| 1 | -1.629030 | 0.246037  | 2.545958 |
| 1 | -2.843568 | -0.976042 | 2.989911 |

**Co-COOH**

|    |           |           |           |
|----|-----------|-----------|-----------|
| 6  | 1.245359  | -0.019413 | -0.332717 |
| 6  | 0.029399  | -0.658640 | -0.792327 |
| 6  | -0.884954 | -0.008367 | -1.660204 |
| 6  | -0.333376 | -1.976982 | -0.346034 |
| 6  | -2.093832 | -0.621374 | -2.035017 |
| 1  | -0.674120 | 0.997699  | -1.996030 |
| 6  | -1.500002 | -2.608820 | -0.776096 |
| 1  | 0.305869  | -2.478027 | 0.367724  |
| 6  | -2.411525 | -1.926823 | -1.613816 |
| 1  | -2.795660 | -0.071131 | -2.649520 |
| 1  | -1.740616 | -3.598230 | -0.405518 |
| 1  | -3.346301 | -2.386375 | -1.906924 |
| 6  | 1.330022  | 1.434361  | -0.221113 |
| 6  | 2.534017  | 2.104894  | -0.526899 |
| 6  | 0.230471  | 2.211108  | 0.198787  |
| 6  | 2.628474  | 3.486180  | -0.428267 |
| 1  | 3.388707  | 1.530297  | -0.864304 |
| 6  | 0.333165  | 3.592089  | 0.300801  |
| 1  | -0.701948 | 1.734436  | 0.468681  |
| 6  | 1.528738  | 4.238850  | -0.012369 |
| 1  | 3.560555  | 3.979860  | -0.683132 |
| 1  | -0.526548 | 4.161496  | 0.637350  |
| 1  | 1.605147  | 5.317995  | 0.068622  |
| 6  | 2.404580  | -0.834785 | 0.018382  |
| 6  | 2.723762  | -2.008438 | -0.696126 |
| 6  | 3.250352  | -0.466185 | 1.085075  |
| 6  | 3.832740  | -2.773511 | -0.360546 |
| 1  | 2.107277  | -2.301461 | -1.538450 |
| 6  | 4.352692  | -1.239382 | 1.424462  |
| 1  | 3.018165  | 0.423790  | 1.657563  |
| 6  | 4.652452  | -2.396137 | 0.703950  |
| 1  | 4.065694  | -3.663000 | -0.936651 |
| 1  | 4.978306  | -0.942716 | 2.259767  |
| 1  | 5.516338  | -2.996437 | 0.968044  |
| 27 | -2.162621 | -0.705305 | 0.243609  |
| 6  | -1.826038 | -0.571925 | 2.168186  |
| 1  | -2.602425 | -1.161926 | 2.668190  |
| 1  | -1.849180 | 0.437143  | 2.583228  |
| 1  | -0.847331 | -1.017897 | 2.374499  |
| 6  | -3.515356 | 0.591216  | 0.491409  |

|   |           |          |          |
|---|-----------|----------|----------|
| 8 | -3.114631 | 1.905005 | 0.348975 |
| 8 | -4.681937 | 0.343931 | 0.708818 |
| 1 | -3.907338 | 2.458665 | 0.472982 |

**TS1<sub>CoH-C</sub>**

|    |           |           |           |
|----|-----------|-----------|-----------|
| 6  | -1.567751 | -0.083800 | 0.243087  |
| 6  | -0.336835 | -0.741998 | 0.584456  |
| 6  | 0.626624  | -0.118711 | 1.417433  |
| 6  | -0.023703 | -2.041138 | 0.092174  |
| 6  | 1.809063  | -0.759962 | 1.765268  |
| 1  | 0.413943  | 0.860154  | 1.827763  |
| 6  | 1.166263  | -2.662705 | 0.403474  |
| 1  | -0.721392 | -2.531144 | -0.574784 |
| 6  | 2.114356  | -2.031464 | 1.240602  |
| 1  | 2.494773  | -0.281381 | 2.455790  |
| 1  | 1.391456  | -3.638003 | -0.012895 |
| 1  | 2.996571  | -2.567418 | 1.569953  |
| 6  | -1.630216 | 1.377226  | 0.191874  |
| 6  | -2.769307 | 2.074761  | 0.639776  |
| 6  | -0.555137 | 2.124360  | -0.327497 |
| 6  | -2.819054 | 3.461912  | 0.587562  |
| 1  | -3.605973 | 1.518411  | 1.046573  |
| 6  | -0.611628 | 3.510689  | -0.386918 |
| 1  | 0.313801  | 1.606782  | -0.713997 |
| 6  | -1.741641 | 4.186487  | 0.074726  |
| 1  | -3.698575 | 3.981853  | 0.952936  |
| 1  | 0.228116  | 4.057354  | -0.800848 |
| 1  | -1.784877 | 5.269650  | 0.032258  |
| 6  | -2.766959 | -0.856662 | -0.073360 |
| 6  | -3.067902 | -2.056967 | 0.602411  |
| 6  | -3.672978 | -0.411778 | -1.057612 |
| 6  | -4.216096 | -2.778756 | 0.303604  |
| 1  | -2.404392 | -2.404924 | 1.385601  |
| 6  | -4.814860 | -1.141473 | -1.361237 |
| 1  | -3.459147 | 0.503979  | -1.595722 |
| 6  | -5.094342 | -2.328034 | -0.682501 |
| 1  | -4.433357 | -3.691558 | 0.848505  |
| 1  | -5.488288 | -0.786573 | -2.134351 |
| 1  | -5.989414 | -2.894068 | -0.917010 |
| 27 | 3.155734  | -0.680460 | -0.413789 |
| 1  | 2.335478  | 0.486227  | -1.289408 |
| 6  | 4.366023  | -2.052536 | -1.180699 |
| 1  | 3.778546  | -2.840634 | -1.666239 |
| 1  | 4.996587  | -2.516202 | -0.412157 |

|   |          |           |           |
|---|----------|-----------|-----------|
| 1 | 5.022652 | -1.601855 | -1.932969 |
| 6 | 3.197927 | 1.920579  | -0.431031 |
| 8 | 2.707631 | 2.841917  | -0.955931 |
| 8 | 3.917620 | 1.340767  | 0.329098  |

### Co-HCOO

|    |           |           |           |
|----|-----------|-----------|-----------|
| 6  | -1.365572 | 0.022781  | 0.316461  |
| 6  | -0.132875 | -0.586568 | 0.759958  |
| 6  | 0.773706  | 0.106405  | 1.636459  |
| 6  | 0.263966  | -1.872360 | 0.332697  |
| 6  | 1.941747  | -0.475587 | 2.102968  |
| 1  | 0.516662  | 1.106131  | 1.961029  |
| 6  | 1.508263  | -2.416695 | 0.712252  |
| 1  | -0.354810 | -2.414102 | -0.370437 |
| 6  | 2.352177  | -1.741887 | 1.618529  |
| 1  | 2.586129  | 0.077311  | 2.775182  |
| 1  | 1.805833  | -3.379865 | 0.317004  |
| 1  | 3.284600  | -2.184017 | 1.943113  |
| 6  | -1.487775 | 1.478435  | 0.231763  |
| 6  | -0.424002 | 2.282102  | -0.227138 |
| 6  | -2.692513 | 2.115308  | 0.594102  |
| 6  | -0.565466 | 3.661948  | -0.312406 |
| 1  | 0.505207  | 1.829330  | -0.552285 |
| 6  | -2.823127 | 3.495502  | 0.516235  |
| 1  | -3.519894 | 1.515430  | 0.955321  |
| 6  | -1.760187 | 4.277255  | 0.061634  |
| 1  | 0.260999  | 4.257092  | -0.686282 |
| 1  | -3.754754 | 3.964695  | 0.815126  |
| 1  | -1.864505 | 5.355052  | -0.004335 |
| 6  | -2.504331 | -0.809780 | -0.059605 |
| 6  | -2.799878 | -2.012089 | 0.616848  |
| 6  | -3.359849 | -0.423682 | -1.112793 |
| 6  | -3.892873 | -2.788712 | 0.255462  |
| 1  | -2.179389 | -2.317691 | 1.451532  |
| 6  | -4.445415 | -1.208164 | -1.478294 |
| 1  | -3.149091 | 0.490622  | -1.654399 |
| 6  | -4.720207 | -2.394484 | -0.796815 |
| 1  | -4.107727 | -3.700523 | 0.803007  |
| 1  | -5.077990 | -0.896804 | -2.302956 |
| 1  | -5.571395 | -3.003883 | -1.080614 |
| 27 | 2.343375  | -0.606161 | -0.233737 |
| 1  | 4.165425  | 2.386796  | -0.995934 |
| 6  | 3.027432  | -1.609127 | -1.749452 |
| 1  | 3.833285  | -2.257064 | -1.391199 |

|   |          |           |           |
|---|----------|-----------|-----------|
| 1 | 3.412808 | -0.910971 | -2.492632 |
| 1 | 2.228397 | -2.215058 | -2.188040 |
| 6 | 3.747382 | 1.420566  | -0.669274 |
| 8 | 4.382798 | 0.679454  | 0.091613  |
| 8 | 2.583128 | 1.129351  | -1.122434 |

**TS<sub>2</sub><sub>CoH-O</sub>**

|    |           |           |           |
|----|-----------|-----------|-----------|
| 6  | 1.252744  | -0.055227 | -0.344915 |
| 6  | 0.051246  | -0.606431 | -0.820773 |
| 6  | -0.944855 | 0.168508  | -1.540558 |
| 6  | -0.322472 | -1.984070 | -0.572629 |
| 6  | -2.076926 | -0.421452 | -2.113333 |
| 1  | -0.755658 | 1.215773  | -1.727340 |
| 6  | -1.491165 | -2.540514 | -1.064191 |
| 1  | 0.322471  | -2.590543 | 0.049058  |
| 6  | -2.408952 | -1.767612 | -1.834090 |
| 1  | -2.742796 | 0.188662  | -2.713151 |
| 1  | -1.732937 | -3.569919 | -0.823187 |
| 1  | -3.307935 | -2.214811 | -2.237986 |
| 6  | 1.496711  | 1.398724  | -0.309645 |
| 6  | 2.744264  | 1.911285  | -0.712624 |
| 6  | 0.531103  | 2.309394  | 0.154393  |
| 6  | 3.006723  | 3.275429  | -0.675244 |
| 1  | 3.507383  | 1.225843  | -1.064186 |
| 6  | 0.798093  | 3.674337  | 0.195995  |
| 1  | -0.430794 | 1.960363  | 0.508280  |
| 6  | 2.033647  | 4.166618  | -0.221405 |
| 1  | 3.973056  | 3.645546  | -1.002939 |
| 1  | 0.035361  | 4.350264  | 0.568547  |
| 1  | 2.239680  | 5.231425  | -0.188148 |
| 6  | 2.348705  | -0.919327 | 0.131210  |
| 6  | 2.747980  | -2.069805 | -0.572643 |
| 6  | 3.060982  | -0.587426 | 1.298088  |
| 6  | 3.796232  | -2.863755 | -0.119784 |
| 1  | 2.243911  | -2.324221 | -1.498514 |
| 6  | 4.104929  | -1.383985 | 1.754320  |
| 1  | 2.781948  | 0.304984  | 1.847056  |
| 6  | 4.477653  | -2.529058 | 1.049948  |
| 1  | 4.091887  | -3.739137 | -0.689379 |
| 1  | 4.630246  | -1.110880 | 2.663900  |
| 1  | 5.295756  | -3.147639 | 1.403453  |
| 27 | -2.398277 | -0.611333 | 0.005572  |
| 6  | -2.426127 | -0.393814 | 2.076463  |
| 1  | -3.089847 | -0.002585 | 2.842719  |

|   |           |           |          |
|---|-----------|-----------|----------|
| 1 | -1.392976 | -0.165730 | 2.326742 |
| 1 | -2.602434 | -1.478669 | 2.043991 |
| 6 | -3.075155 | 0.894916  | 0.901216 |
| 8 | -4.444008 | 0.613346  | 0.777545 |
| 8 | -2.673591 | 2.030496  | 1.035810 |
| 1 | -4.895306 | 1.461151  | 0.636850 |

**TS2<sub>CoH-C</sub>**

|    |           |           |           |
|----|-----------|-----------|-----------|
| 6  | 0.985714  | -0.062195 | -0.548953 |
| 6  | -0.271927 | -0.413772 | -1.093873 |
| 6  | -1.087066 | 0.514701  | -1.834466 |
| 6  | -0.893121 | -1.694376 | -0.845695 |
| 6  | -2.288109 | 0.127706  | -2.445721 |
| 1  | -0.733161 | 1.525926  | -1.978746 |
| 6  | -2.099971 | -2.072387 | -1.450247 |
| 1  | -0.403755 | -2.395398 | -0.184331 |
| 6  | -2.806329 | -1.181040 | -2.293104 |
| 1  | -2.835659 | 0.855357  | -3.034172 |
| 1  | -2.506874 | -3.056901 | -1.247088 |
| 1  | -3.728965 | -1.477048 | -2.775065 |
| 6  | 1.386669  | 1.350208  | -0.410990 |
| 6  | 0.522175  | 2.311146  | 0.141863  |
| 6  | 2.672709  | 1.768919  | -0.797142 |
| 6  | 0.919549  | 3.635886  | 0.285161  |
| 1  | -0.453331 | 2.001498  | 0.495921  |
| 6  | 3.068324  | 3.094302  | -0.658127 |
| 1  | 3.358520  | 1.041206  | -1.216822 |
| 6  | 2.192729  | 4.036962  | -0.118781 |
| 1  | 0.239143  | 4.354118  | 0.731364  |
| 1  | 4.062278  | 3.394413  | -0.974384 |
| 1  | 2.502551  | 5.070614  | -0.006394 |
| 6  | 1.927612  | -1.080071 | -0.084450 |
| 6  | 2.092401  | -2.314934 | -0.747634 |
| 6  | 2.731049  | -0.846330 | 1.052729  |
| 6  | 3.005418  | -3.259741 | -0.298760 |
| 1  | 1.522742  | -2.509926 | -1.649014 |
| 6  | 3.642873  | -1.794522 | 1.501093  |
| 1  | 2.630524  | 0.093766  | 1.582647  |
| 6  | 3.786997  | -3.007974 | 0.830454  |
| 1  | 3.122183  | -4.191910 | -0.842495 |
| 1  | 4.241855  | -1.585821 | 2.381771  |
| 1  | 4.501394  | -3.746378 | 1.178407  |
| 27 | -2.662774 | -0.280285 | -0.324942 |
| 1  | -3.246624 | 1.863959  | 2.859219  |

|   |           |           |           |
|---|-----------|-----------|-----------|
| 6 | -0.538601 | -0.905107 | 2.548627  |
| 6 | 2.158667  | 0.333621  | 0.397836  |
| 6 | 1.283699  | -0.134591 | 1.389161  |
| 6 | 1.031015  | -1.545477 | 1.623130  |
| 6 | 0.508097  | 0.759321  | 2.228391  |
| 6 | 0.100323  | -1.995001 | 2.545035  |
| 1 | 1.559553  | -2.270960 | 1.019068  |
| 6 | -0.408861 | 0.302072  | 3.162589  |
| 1 | 0.668520  | 1.824886  | 2.128458  |
| 6 | -0.700600 | -1.084927 | 3.292777  |
| 1 | -0.064900 | -3.061864 | 2.655839  |
| 1 | -0.944054 | 1.019131  | 3.776698  |
| 1 | -1.398676 | -1.439661 | 4.039810  |
| 6 | 3.168733  | -0.538929 | -0.217605 |
| 1 | -1.431023 | -1.493953 | 2.403021  |
| 1 | 0.057943  | -0.634704 | 1.695203  |
| 1 | -0.101020 | -0.854387 | 3.532944  |
| 6 | -2.594391 | 1.137739  | 2.343445  |
| 8 | -3.102580 | 0.600801  | 1.313801  |
| 8 | -1.469991 | 0.945905  | 2.842422  |

Bipyridyl-Co-C•Ph<sub>3</sub> (triplet)



|    |           |           |           |                     |
|----|-----------|-----------|-----------|---------------------|
| 6  | 3.430754  | -0.472183 | -1.600325 |                     |
| 6  | 3.932284  | -1.448559 | 0.540024  |                     |
| 6  | 4.388771  | -1.284468 | -2.194951 |                     |
| 1  | 2.864578  | 0.224638  | -2.208081 |                     |
| 6  | 4.890339  | -2.261883 | -0.054794 |                     |
| 1  | 3.784834  | -1.492655 | 1.613685  |                     |
| 6  | 5.124101  | -2.189192 | -1.428214 |                     |
| 1  | 4.560183  | -1.215403 | -3.264801 |                     |
| 1  | 5.470057  | -2.944389 | 0.559256  |                     |
| 1  | 5.873948  | -2.821213 | -1.892290 |                     |
| 6  | 2.064441  | 1.715338  | -0.110093 |                     |
| 6  | 0.825808  | 2.296979  | -0.439969 |                     |
| 6  | 3.221438  | 2.483261  | -0.336119 |                     |
| 6  | 0.745333  | 3.587293  | -0.952505 |                     |
| 1  | -0.080116 | 1.715602  | -0.319603 | Bipyrid             |
| 6  | 3.142329  | 3.774312  | -0.846283 | yl-Co-              |
| 1  | 4.189642  | 2.053437  | -0.103531 | C•Ph <sub>3</sub> - |
| 6  | 1.903620  | 4.337632  | -1.155601 | H <sub>2</sub>      |
| 1  | -0.225573 | 3.999872  | -1.209320 | (triplet)           |
| 1  | 4.051919  | 4.346510  | -1.000929 |                     |
| 1  | 1.843455  | 5.344009  | -1.556784 |                     |
| 27 | -1.315920 | -0.626404 | 1.237560  |                     |
| 6  | -1.599945 | -2.938960 | -0.687351 |                     |
| 6  | -2.141471 | -3.619639 | -1.755964 |                     |
| 6  | -3.129884 | -2.977991 | -2.527611 |                     |
| 6  | -3.503226 | -1.691808 | -2.198723 |                     |
| 6  | -2.902368 | -1.039138 | -1.106919 |                     |
| 7  | -1.962446 | -1.686425 | -0.342026 |                     |
| 1  | -3.587495 | -3.483288 | -3.370588 |                     |
| 1  | -0.839050 | -3.391297 | -0.060987 |                     |
| 1  | -1.808990 | -4.624775 | -1.984780 |                     |
| 1  | -4.256006 | -1.182168 | -2.786932 |                     |
| 6  | -2.632494 | 2.060230  | 0.761192  |                     |
| 6  | -3.462252 | 2.951630  | 0.117962  |                     |
| 6  | -4.200482 | 2.498176  | -0.993435 |                     |
| 6  | -4.054619 | 1.188892  | -1.402537 |                     |
| 6  | -3.178258 | 0.327957  | -0.717742 |                     |
| 7  | -2.480657 | 0.774941  | 0.378486  |                     |
| 1  | -4.869372 | 3.167005  | -1.523047 |                     |
| 1  | -2.046283 | 2.361106  | 1.622323  |                     |
| 1  | -3.540049 | 3.972895  | 0.470491  |                     |
| 1  | -4.606337 | 0.828078  | -2.261438 |                     |
| 6  | 1.875504  | -0.203124 | 0.720840  |                     |
| 6  | 0.838719  | -1.113902 | 0.993308  |                     |

|    |           |           |           |
|----|-----------|-----------|-----------|
| 6  | 0.665287  | -2.359097 | 0.265607  |
| 6  | -0.205575 | -0.861674 | 1.957464  |
| 6  | -0.329069 | -3.290292 | 0.583890  |
| 1  | 1.373277  | -2.615855 | -0.510412 |
| 6  | -1.205581 | -1.778309 | 2.240413  |
| 1  | -0.181357 | 0.060040  | 2.522282  |
| 6  | -1.305056 | -3.021693 | 1.572126  |
| 1  | -0.354132 | -4.232780 | 0.045501  |
| 1  | -1.941768 | -1.522952 | 2.997130  |
| 1  | -2.049200 | -3.757783 | 1.847957  |
| 6  | 3.081342  | -0.612951 | -0.018445 |
| 6  | 3.716534  | 0.266818  | -0.920917 |
| 6  | 3.681282  | -1.878023 | 0.151431  |
| 6  | 4.856193  | -0.101044 | -1.625994 |
| 1  | 3.307617  | 1.262062  | -1.051075 |
| 6  | 4.817576  | -2.250971 | -0.558430 |
| 1  | 3.258780  | -2.566114 | 0.874851  |
| 6  | 5.414349  | -1.369177 | -1.459632 |
| 1  | 5.312576  | 0.606414  | -2.312463 |
| 1  | 5.252664  | -3.232002 | -0.391275 |
| 1  | 6.303379  | -1.658590 | -2.010014 |
| 6  | 1.819509  | 1.193915  | 1.188801  |
| 6  | 0.643963  | 1.967371  | 1.119459  |
| 6  | 2.969280  | 1.838254  | 1.689776  |
| 6  | 0.613360  | 3.294662  | 1.531783  |
| 1  | -0.256134 | 1.519730  | 0.719646  |
| 6  | 2.942985  | 3.166514  | 2.098594  |
| 1  | 3.894928  | 1.277521  | 1.756867  |
| 6  | 1.763596  | 3.909430  | 2.025908  |
| 1  | -0.313058 | 3.857035  | 1.453873  |
| 1  | 3.848620  | 3.623942  | 2.485981  |
| 1  | 1.742759  | 4.945636  | 2.347286  |
| 27 | -1.520027 | -1.617257 | -0.303681 |
| 6  | 0.230056  | 0.262406  | -1.908507 |
| 6  | 0.642613  | 1.510673  | -2.356498 |
| 6  | -0.248616 | 2.574470  | -2.291203 |
| 6  | -1.527427 | 2.351183  | -1.788881 |
| 6  | -1.876363 | 1.072731  | -1.360585 |
| 7  | -1.002803 | 0.038409  | -1.427236 |
| 1  | 0.049059  | 3.567674  | -2.606702 |
| 1  | 0.895822  | -0.588935 | -1.934591 |
| 1  | 1.650688  | 1.637753  | -2.728945 |
| 1  | -2.225673 | 3.173543  | -1.700463 |
| 6  | -4.369106 | -0.805806 | 0.501163  |

|   |           |           |           |
|---|-----------|-----------|-----------|
| 6 | -5.492527 | 0.006544  | 0.546632  |
| 6 | -5.444396 | 1.240402  | -0.101662 |
| 6 | -4.275670 | 1.613423  | -0.750497 |
| 6 | -3.176454 | 0.750474  | -0.740262 |
| 7 | -3.237927 | -0.454531 | -0.125417 |
| 1 | -6.305028 | 1.899835  | -0.103027 |
| 1 | -4.353522 | -1.777225 | 0.982509  |
| 1 | -6.380871 | -0.322507 | 1.072270  |
| 1 | -4.222003 | 2.562660  | -1.267715 |
| 1 | -1.847736 | -2.577416 | -1.859131 |
| 1 | -2.431697 | -2.802122 | -1.396463 |

PD-Co-C•Ph<sub>3</sub> (triplet)

|    |           |           |           |
|----|-----------|-----------|-----------|
| 27 | 1.916053  | -0.460959 | -0.818191 |
| 6  | 4.150812  | -0.277426 | 1.162314  |
| 6  | 3.781224  | 1.158279  | 1.471064  |
| 6  | 2.354966  | 1.636193  | 1.286997  |
| 6  | 1.966971  | 2.829243  | 2.118322  |
| 1  | 1.917906  | 2.556793  | 3.178180  |
| 1  | 2.711876  | 3.626921  | 2.030499  |
| 1  | 0.996975  | 3.225511  | 1.816505  |
| 1  | 4.088745  | 1.380024  | 2.498112  |
| 6  | 5.320364  | -0.811334 | 1.943674  |
| 1  | 5.624179  | -1.798875 | 1.591850  |
| 1  | 6.181613  | -0.138791 | 1.869349  |
| 1  | 5.070324  | -0.886645 | 3.007537  |
| 7  | 3.522645  | -0.961434 | 0.276884  |
| 7  | 1.568135  | 1.065148  | 0.460529  |
| 1  | 3.900754  | -1.902403 | 0.176816  |
| 1  | 0.640256  | 1.486480  | 0.417515  |
| 1  | 4.425316  | 1.805955  | 0.854658  |
| 6  | -1.767981 | -0.275245 | -0.383569 |
| 6  | -0.673775 | -0.802748 | -1.084600 |
| 6  | -0.002957 | -2.042575 | -0.718185 |
| 6  | 0.027370  | -0.075094 | -2.126472 |
| 6  | 1.035456  | -2.596469 | -1.463190 |
| 1  | -0.333758 | -2.566581 | 0.167258  |
| 6  | 1.090854  | -0.631005 | -2.852233 |
| 1  | -0.305273 | 0.918550  | -2.396028 |
| 6  | 1.597227  | -1.926771 | -2.574837 |
| 1  | 1.455451  | -3.546139 | -1.142509 |
| 1  | 1.519320  | -0.052562 | -3.665262 |
| 1  | 2.385219  | -2.367413 | -3.171545 |

|   |           |           |           |
|---|-----------|-----------|-----------|
| 6 | -2.629531 | -1.047245 | 0.509932  |
| 6 | -3.403684 | -0.437185 | 1.527244  |
| 6 | -2.823280 | -2.442822 | 0.349911  |
| 6 | -4.249114 | -1.170564 | 2.352228  |
| 1 | -3.354291 | 0.634835  | 1.667827  |
| 6 | -3.666382 | -3.172206 | 1.176888  |
| 1 | -2.338982 | -2.952331 | -0.473496 |
| 6 | -4.381708 | -2.549908 | 2.201635  |
| 1 | -4.815929 | -0.652505 | 3.120968  |
| 1 | -3.784715 | -4.238275 | 1.003092  |
| 1 | -5.041123 | -3.120589 | 2.847014  |
| 6 | -2.055920 | 1.181063  | -0.532440 |
| 6 | -1.714900 | 2.092097  | 0.481783  |
| 6 | -2.654556 | 1.703540  | -1.687492 |
| 6 | -1.949636 | 3.459994  | 0.347859  |
| 1 | -1.286386 | 1.707382  | 1.402972  |
| 6 | -2.880589 | 3.070762  | -1.835033 |
| 1 | -2.944498 | 1.017311  | -2.476265 |
| 6 | -2.527671 | 3.957368  | -0.818396 |
| 1 | -1.687690 | 4.137486  | 1.155877  |
| 1 | -3.344259 | 3.445015  | -2.742690 |
| 1 | -2.711284 | 5.021097  | -0.929385 |

PD-Co-C•Ph<sub>3</sub>-H<sub>2</sub> (triplet)

|    |           |           |           |
|----|-----------|-----------|-----------|
| 27 | -1.995822 | 1.110918  | 0.311383  |
| 6  | -3.941476 | -0.766703 | -1.036735 |
| 6  | -3.065321 | -0.628189 | -2.271002 |
| 6  | -1.585587 | -0.799262 | -1.967850 |
| 6  | -0.848231 | -1.904635 | -2.665989 |
| 1  | -1.333541 | -2.868358 | -2.476422 |
| 1  | -0.860131 | -1.753133 | -3.750915 |
| 1  | 0.186379  | -1.969063 | -2.327696 |
| 1  | -3.385023 | -1.335163 | -3.037835 |
| 6  | -5.068213 | -1.756418 | -1.113201 |
| 1  | -5.660999 | -1.773435 | -0.196736 |
| 1  | -5.730903 | -1.520813 | -1.952480 |
| 1  | -4.678742 | -2.763890 | -1.294932 |
| 7  | -3.679484 | -0.048739 | -0.010890 |
| 7  | -1.063083 | -0.009263 | -1.116092 |
| 1  | -4.317956 | -0.220910 | 0.764458  |
| 1  | -0.072886 | -0.187079 | -0.915932 |

|   |           |           |           |
|---|-----------|-----------|-----------|
| 1 | -3.214954 | 0.379705  | -2.676554 |
| 6 | 1.575402  | 0.146959  | 0.646514  |
| 6 | 0.459825  | 0.618249  | 1.366118  |
| 6 | -0.527987 | -0.259403 | 1.964862  |
| 6 | 0.110099  | 2.018775  | 1.449332  |
| 6 | -1.671714 | 0.208690  | 2.597074  |
| 1 | -0.388558 | -1.329202 | 1.893672  |
| 6 | -1.043735 | 2.472555  | 2.081005  |
| 1 | 0.787048  | 2.751611  | 1.032813  |
| 6 | -1.980397 | 1.587166  | 2.662987  |
| 1 | -2.362066 | -0.515303 | 3.021519  |
| 1 | -1.226870 | 3.542393  | 2.119023  |
| 1 | -2.854482 | 1.951603  | 3.187275  |
| 6 | 2.000323  | -1.261350 | 0.701415  |
| 6 | 2.469754  | -1.914535 | -0.460327 |
| 6 | 1.983599  | -2.026101 | 1.886292  |
| 6 | 2.865020  | -3.246783 | -0.445028 |
| 1 | 2.538912  | -1.349719 | -1.384642 |
| 6 | 2.372793  | -3.361401 | 1.901873  |
| 1 | 1.686457  | -1.549637 | 2.813648  |
| 6 | 2.811408  | -3.989215 | 0.735724  |
| 1 | 3.218820  | -3.710450 | -1.361600 |
| 1 | 2.353893  | -3.911058 | 2.838616  |
| 1 | 3.120988  | -5.028981 | 0.749983  |
| 6 | 2.389921  | 1.040933  | -0.206442 |
| 6 | 1.826611  | 1.963427  | -1.110498 |
| 6 | 3.796841  | 0.959409  | -0.182730 |
| 6 | 2.618575  | 2.763969  | -1.928501 |
| 1 | 0.748163  | 2.046695  | -1.181992 |
| 6 | 4.590124  | 1.753602  | -1.002383 |
| 1 | 4.265158  | 0.254720  | 0.495811  |
| 6 | 4.008595  | 2.667454  | -1.882434 |
| 1 | 2.145031  | 3.459102  | -2.616081 |
| 1 | 5.671246  | 1.665790  | -0.948173 |
| 1 | 4.627119  | 3.290875  | -2.519754 |
| 1 | -2.826468 | 2.604548  | -0.305391 |
| 1 | -2.227829 | 2.527239  | -0.808615 |

CO-Co-C•Ph<sub>3</sub> (triplet)

|   |           |           |          |
|---|-----------|-----------|----------|
| 6 | 1.801368  | -0.029191 | 0.375022 |
| 6 | 0.496974  | -0.364107 | 0.726232 |
| 6 | -0.075094 | -1.692136 | 0.503545 |

|    |           |           |           |
|----|-----------|-----------|-----------|
| 6  | -0.468295 | 0.593902  | 1.251343  |
| 6  | -1.350366 | -2.059492 | 0.956023  |
| 1  | 0.540627  | -2.444863 | 0.030286  |
| 6  | -1.742825 | 0.231129  | 1.648809  |
| 1  | -0.161441 | 1.623730  | 1.373901  |
| 6  | -2.239400 | -1.097649 | 1.484849  |
| 1  | -1.689110 | -3.079024 | 0.803734  |
| 1  | -2.404867 | 0.996444  | 2.039468  |
| 1  | -3.234332 | -1.367650 | 1.810578  |
| 6  | 2.812332  | -1.063593 | 0.083616  |
| 6  | 3.702988  | -0.909234 | -0.994236 |
| 6  | 2.952604  | -2.212865 | 0.882785  |
| 6  | 4.670077  | -1.868311 | -1.273944 |
| 1  | 3.626112  | -0.024713 | -1.616805 |
| 6  | 3.920244  | -3.172430 | 0.604313  |
| 1  | 2.308151  | -2.336313 | 1.746416  |
| 6  | 4.783309  | -3.008678 | -0.478893 |
| 1  | 5.337489  | -1.726720 | -2.118172 |
| 1  | 4.011842  | -4.043941 | 1.245022  |
| 1  | 5.539988  | -3.755473 | -0.694937 |
| 6  | 2.238652  | 1.377508  | 0.250304  |
| 6  | 1.488950  | 2.330503  | -0.460219 |
| 6  | 3.459307  | 1.794632  | 0.808914  |
| 6  | 1.925435  | 3.646004  | -0.585160 |
| 1  | 0.563904  | 2.025903  | -0.938386 |
| 6  | 3.897696  | 3.108185  | 0.684473  |
| 1  | 4.063270  | 1.072824  | 1.347727  |
| 6  | 3.131354  | 4.044176  | -0.010188 |
| 1  | 1.329640  | 4.358392  | -1.147224 |
| 1  | 4.840295  | 3.404469  | 1.133732  |
| 1  | 3.474159  | 5.068672  | -0.109556 |
| 6  | -2.822578 | 0.329176  | -1.574659 |
| 8  | -3.622896 | 0.881999  | -2.178895 |
| 27 | -1.614316 | -0.556530 | -0.578956 |

CO-Co-C•Ph<sub>3</sub>-H<sub>2</sub> (triplet)

|   |           |           |           |
|---|-----------|-----------|-----------|
| 6 | -0.765457 | 0.033860  | -0.384353 |
| 6 | 0.450409  | -0.330300 | -0.967088 |
| 6 | 1.075624  | -1.631203 | -0.757667 |
| 6 | 1.246331  | 0.576539  | -1.783198 |
| 6 | 2.287840  | -1.993020 | -1.352570 |
| 1 | 0.561623  | -2.360060 | -0.146188 |

|    |           |           |           |
|----|-----------|-----------|-----------|
| 6  | 2.461837  | 0.221003  | -2.326405 |
| 1  | 0.856440  | 1.566199  | -1.980134 |
| 6  | 3.060299  | -1.051391 | -2.067805 |
| 1  | 2.684420  | -2.987074 | -1.173920 |
| 1  | 3.008350  | 0.951760  | -2.913158 |
| 1  | 4.005315  | -1.324773 | -2.516732 |
| 6  | -1.676889 | -0.972578 | 0.191325  |
| 6  | -2.324380 | -0.732810 | 1.417287  |
| 6  | -1.963779 | -2.181629 | -0.468488 |
| 6  | -3.196936 | -1.665154 | 1.967114  |
| 1  | -2.132772 | 0.198257  | 1.939172  |
| 6  | -2.837587 | -3.114583 | 0.080127  |
| 1  | -1.511949 | -2.374455 | -1.435541 |
| 6  | -3.457382 | -2.864518 | 1.304184  |
| 1  | -3.675001 | -1.456412 | 2.919048  |
| 1  | -3.047978 | -4.033782 | -0.457725 |
| 1  | -4.141024 | -3.590622 | 1.731249  |
| 6  | -1.190997 | 1.444876  | -0.291918 |
| 6  | -0.317708 | 2.461025  | 0.134638  |
| 6  | -2.515989 | 1.810326  | -0.589796 |
| 6  | -0.740279 | 3.782705  | 0.234233  |
| 1  | 0.698321  | 2.202059  | 0.412892  |
| 6  | -2.940342 | 3.130510  | -0.489935 |
| 1  | -3.212837 | 1.042293  | -0.906866 |
| 6  | -2.054007 | 4.127169  | -0.081309 |
| 1  | -0.045463 | 4.544004  | 0.574989  |
| 1  | -3.966653 | 3.384243  | -0.735914 |
| 1  | -2.385156 | 5.157190  | -0.001508 |
| 6  | 3.867063  | 0.964350  | 0.586356  |
| 8  | 4.603622  | 1.793767  | 0.869698  |
| 27 | 2.739550  | -0.353912 | 0.044069  |
| 1  | 2.906736  | -1.648658 | 1.562907  |
| 1  | 3.615495  | -1.656273 | 1.282428  |

Ethylene-Co-C•Ph<sub>3</sub> (triplet)

|   |           |           |          |
|---|-----------|-----------|----------|
| 6 | 2.051969  | 0.430166  | 0.394756 |
| 6 | 1.170019  | 0.003742  | 1.375847 |
| 6 | 0.857850  | -1.404457 | 1.607132 |
| 6 | 0.384290  | 0.908000  | 2.199112 |
| 6 | 0.053843  | -1.841239 | 2.654635 |
| 1 | 1.307534  | -2.145413 | 0.960165 |
| 6 | -0.448571 | 0.467702  | 3.212786 |
| 1 | 0.488808  | 1.973903  | 2.048019 |

|    |           |           |           |
|----|-----------|-----------|-----------|
| 6  | -0.662121 | -0.923465 | 3.471515  |
| 1  | -0.086040 | -2.907878 | 2.800483  |
| 1  | -0.975174 | 1.203741  | 3.811847  |
| 1  | -1.247004 | -1.257027 | 4.318334  |
| 6  | 2.984062  | -0.500872 | -0.272158 |
| 6  | 3.192741  | -0.432331 | -1.661851 |
| 6  | 3.723157  | -1.458637 | 0.445680  |
| 6  | 4.074918  | -1.294006 | -2.304340 |
| 1  | 2.650946  | 0.310041  | -2.237872 |
| 6  | 4.604623  | -2.322922 | -0.195784 |
| 1  | 3.618565  | -1.504292 | 1.524390  |
| 6  | 4.784313  | -2.249621 | -1.576704 |
| 1  | 4.208002  | -1.221500 | -3.379334 |
| 1  | 5.167272  | -3.045430 | 0.387522  |
| 1  | 5.474700  | -2.920364 | -2.077254 |
| 6  | 2.094011  | 1.837597  | -0.059455 |
| 6  | 0.928452  | 2.546083  | -0.397313 |
| 6  | 3.323092  | 2.501365  | -0.216203 |
| 6  | 0.983653  | 3.862409  | -0.845617 |
| 1  | -0.031680 | 2.046775  | -0.323618 |
| 6  | 3.382119  | 3.816213  | -0.664958 |
| 1  | 4.238717  | 1.970731  | 0.021350  |
| 6  | 2.212119  | 4.507897  | -0.979185 |
| 1  | 0.066052  | 4.380854  | -1.106539 |
| 1  | 4.345637  | 4.305650  | -0.767561 |
| 1  | 2.258079  | 5.533294  | -1.330651 |
| 27 | -1.467375 | -0.718366 | 1.517477  |
| 6  | -1.628230 | -0.855336 | -0.512506 |
| 6  | -2.523696 | 0.094485  | -0.029345 |
| 1  | -3.573681 | -0.159773 | 0.099076  |
| 1  | -2.309812 | 1.156330  | -0.099821 |
| 1  | -0.676479 | -0.567711 | -0.947965 |
| 1  | -1.967538 | -1.859925 | -0.755212 |

Ethylene-Co-C•Ph<sub>3</sub>-H<sub>2</sub> (triplet)

|   |           |           |           |
|---|-----------|-----------|-----------|
| 6 | -0.804296 | 0.011567  | -0.423812 |
| 6 | 0.507455  | -0.175516 | -0.827695 |
| 6 | 1.224457  | -1.437022 | -0.636133 |
| 6 | 1.327672  | 0.879892  | -1.395509 |
| 6 | 2.509295  | -1.655265 | -1.126741 |
| 1 | 0.701240  | -2.264141 | -0.176982 |
| 6 | 2.637886  | 0.685851  | -1.767165 |



|    |           |           |           |
|----|-----------|-----------|-----------|
| 1  | 0.885222  | 1.854801  | -1.549457 |
| 6  | 3.297755  | -0.581664 | -1.618732 |
| 1  | 2.942819  | -2.647310 | -1.046614 |
| 1  | 3.193335  | 1.518813  | -2.186859 |
| 1  | 4.276009  | -0.753279 | -2.049068 |
| 6  | -1.669643 | -1.126371 | -0.044462 |
| 6  | -2.467002 | -1.062669 | 1.112108  |
| 6  | -1.759841 | -2.289033 | -0.829343 |
| 6  | -3.293492 | -2.118867 | 1.479992  |
| 1  | -2.432601 | -0.168032 | 1.724764  |
| 6  | -2.585030 | -3.347929 | -0.462576 |
| 1  | -1.188464 | -2.347797 | -1.749655 |
| 6  | -3.355139 | -3.271839 | 0.697279  |
| 1  | -3.891567 | -2.043063 | 2.382872  |
| 1  | -2.639502 | -4.229507 | -1.093980 |
| 1  | -4.001887 | -4.095110 | 0.982105  |
| 6  | -1.420172 | 1.353645  | -0.328923 |
| 6  | -0.770504 | 2.436046  | 0.289080  |
| 6  | -2.721232 | 1.574205  | -0.814568 |
| 6  | -1.377732 | 3.683440  | 0.394668  |
| 1  | 0.217476  | 2.288946  | 0.710828  |
| 6  | -3.331517 | 2.819251  | -0.709884 |
| 1  | -3.252677 | 0.751007  | -1.279472 |
| 6  | -2.662456 | 3.884969  | -0.107894 |
| 1  | -0.852188 | 4.496941  | 0.885485  |
| 1  | -4.333865 | 2.960077  | -1.102266 |
| 1  | -3.138875 | 4.856113  | -0.024285 |
| 27 | 3.014292  | -0.259273 | 0.478744  |
| 6  | 1.877818  | 0.064189  | 2.210387  |
| 6  | 2.787613  | 1.094341  | 2.025747  |
| 1  | 3.703370  | 1.136079  | 2.610197  |
| 1  | 2.479812  | 2.031968  | 1.572762  |
| 1  | 0.847860  | 0.155145  | 1.880146  |
| 1  | 2.065642  | -0.720931 | 2.935904  |
| 1  | 4.422186  | -1.543112 | 1.159367  |
| 1  | 3.822584  | -1.803087 | 1.545759  |
